# Supplementary material
Source: HighWire-hosted journal article supplement (https://diabetes.diabetesjournals.org/content/suppl/2005/08/16/54.1.290)
Supplement: OnlineAppendixpg290.pdf [file OnlineAppendixpg290.pdf]

Appendix Table 1. Multipoint Linkage Analysis for Fasting Insulin.

| Chr | Position (cM) | LOD  | Support Interval (cM) | P-value              | Flanking Markers     |
|-----|---------------|------|-----------------------|----------------------|----------------------|
| 1   | 218           | 0.47 | 196-254               | 0.141                | D1S1660 / GATA124F08 |
| 2   | 20            | 0.11 | 14-24                 | 0.475                | D2S2952 / D2S1400    |
| 3   | 135           | 0.80 | 78-212                | 0.055                | / D3S2460            |
| 4   | 200           | 0.37 | 194 – qter            | 0.191                | AAT031 / D4S1652     |
| 5   | 74            | 1.13 | 28-86                 | 0.023                | D5S2500 / GATA138B05 |
| 6   | 130           | 1.34 | 124-146               | 0.013                | D6S1040 / D6S1009    |
| 7   | 87            | 1.05 | 38-110                | 0.028                | D7S3046 / D7S2204    |
| 8   | 104           | 0.57 | 90-116                | 0.105                | / GATA8B01           |
| 9   | 0             | 0.00 | --                    | 1.000                |                      |
| 10  | 144           | 0.21 | 128-154               | 0.329                | D10S1230 / D10S1222  |
| 11  | 60            | 0.09 | 50-66                 | 0.519                | D11S2006 / D11S2371  |
| 12  | 105           | 0.67 | 88-134                | 0.078                | D12S1300 / PAH       |
| 13  | 104           | 0.14 | 100 – qter            | 0.429                | D13S895 / AGAT113    |
| 14  | 14            | 0.18 | 8-22                  | 0.366                | D14S742 / ATA77F05   |
| 15  | 0             | 0.95 | pter-50               | 0.036                | / AATA036            |
| 16  | 0             | 0.00 | --                    | 1.000                |                      |
| 17  | 54            | 3.30 | 38-59                 | $1.0 \times 10^{-4}$ | D17S1294 / D17S1299  |
| 18  | 78            | 0.87 | 62-92                 | 0.046                | D18S851 / D18S858    |
| 19  | 58            | 0.49 | 14-88                 | 0.135                | D19S433 / mfd235     |
| 20  | 52            | 0.11 | 46-58                 | 0.481                | D20S477 / D20S489    |
| 21  | 0             | 0.00 | --                    | 1.000                |                      |
| 22  | 0             | 0.00 | --                    | 1.000                |                      |

Appendix Table 2. Multipoint Linkage Analysis of Fasting Glucose Levels.

| Chr | Position (cM) | LOD  | Support Interval (cM) | P-value | Flanking Markers     |
|-----|---------------|------|-----------------------|---------|----------------------|
| 1   | 220           | 0.60 | 186 - 250             | 0.097   | D1S1660 / GATA124F08 |
| 2   | 0             | 0.62 | pter - 26             | 0.091   | / SRA                |
| 3   | 214           | 0.24 | 198 - qter            | 0.291   | D3S2398 / D3S2418    |
| 4   | 56            | 0.11 | 52 - 60               | 0.487   | D4S2632 / D4S1627    |
| 5   | 116           | 0.09 | 108 - 120             | 0.524   | D5S1462 / D5S2501    |
| 6   | 97            | 0.72 | 30 - 120              | 0.069   | D6S1031 / D6S1056    |
| 7   | 0             | 0.31 | pter - 6              | 0.234   | / afm035xb9          |
| 8   | 4             | 0.33 | pter - 16             | 0.216   | / ATT023             |
| 9   | 1             | 0.63 | pter - 28             | 0.088   | mfd455 / AAAAC001    |
| 10  | 4             | 0.31 | pter - 28             | 0.231   | / D10S1435           |
| 11  | 2             | 0.37 | pter - 20             | 0.191   | / D11S1984           |
| 12  | 166           | 0.18 | 134 - qter            | 0.363   | D12S1045 / AAAAT002  |
| 13  | 14            | 0.39 | pter - 44             | 0.178   | D13S787 / ATA5A09    |
| 14  | 64            | 0.24 | 48 - 88               | 0.290   | GGAA30H04 / D14S592  |
| 15  | 112           | 0.54 | 90 - qter             | 0.116   | GATA197B10 / D15S642 |
| 16  | 130           | 0.01 | 128 - qter            | 0.853   | / D16S2621           |
| 17  | 58            | 1.44 | 36 - 68               | 0.010   | D17S1294 / D17S1299  |
| 18  | 70            | 0.10 | 64 - 76               | 0.488   | D18S535 / D18S851    |
| 19  | 58            | 0.50 | 40 - 68               | 0.128   | D19S433 / mfd235     |
| 20  | 10            | 0.17 | pter - 22             | 0.381   | AAAT007 / D20S482    |
| 21  | 24            | 0.28 | 16 - 50               | 0.257   | SNP385538 / D21S2052 |
| 22  | 58            | 0.95 | 42 - qter             | 0.037   | D22S532 / TCTA015    |

Appendix Table 3. Allelic and Genotypic Association of Fasting Insulin with Chromosome 17 Genome Scan Markers.

| Marker     | Global Allele Association |          |         | Global Genotypic Association |          |         |
|------------|---------------------------|----------|---------|------------------------------|----------|---------|
|            | DF                        | $\chi^2$ | P-value | DF                           | $\chi^2$ | P-value |
| D17S1308   | 6                         | 4.82     | 0.57    | 15                           | 9.59     | 0.84    |
| GATA158H04 | 7                         | 6.39     | 0.50    | 21                           | 14.27    | 0.86    |
| D17S974    | 7                         | 7.00     | 0.43    | 21                           | 17.97    | 0.65    |
| ATA78D02   | 22                        | 11.99    | 0.21    | 22                           | 30.86    | 0.10    |
| D17S2196   | 8                         | 5.26     | 0.73    | 30                           | 19.26    | 0.93    |
| D17S1294   | 9                         | 7.34     | 0.60    | 22                           | 16.60    | 0.78    |
| D17S1299   | 8                         | 9.51     | 0.30    | 20                           | 22.94    | 0.29    |
| SNP427776  | 10                        | 11.80    | 0.30    | 35                           | 29.26    | 0.74    |
| AAT245     | 11                        | 20.29    | 0.04    | 30                           | 31.40    | 0.40    |
| D17S1290   | 12                        | 14.34    | 0.28    | 51                           | 37.74    | 0.92    |
| D17S2193   | 17                        | 21.42    | 0.21    | 36                           | 41.09    | 0.26    |
| D17S1301   | 6                         | 0.87     | 0.99    | 15                           | 12.91    | 0.61    |
| TTCA006    | 6                         | 6.74     | 0.35    | 14                           | 17.96    | 0.21    |
| AAT095     | 10                        | 9.95     | 0.45    | 30                           | 25.56    | 0.70    |

Appendix Table 4. Allelic and Genotypic Association of Fasting Glucose with Chromosome 17 Genome Scan Markers.

| Marker     | Global Allele Association |          |         | Global Genotypic Association |          |         |
|------------|---------------------------|----------|---------|------------------------------|----------|---------|
|            | DF                        | $\chi^2$ | P-value | DF                           | $\chi^2$ | P-value |
| D17S1308   | 6                         | 6.31     | 0.39    | 15                           | 16.38    | 0.36    |
| GATA158H04 | 7                         | 5.70     | 0.58    | 21                           | 12.85    | 0.91    |
| D17S974    | 7                         | 5.39     | 0.61    | 21                           | 14.64    | 0.84    |
| ATA78D02   | 9                         | 9.54     | 0.39    | 22                           | 20.33    | 0.56    |
| D17S2196   | 8                         | 8.50     | 0.39    | 30                           | 38.15    | 0.15    |
| D17S1294   | 9                         | 5.82     | 0.76    | 22                           | 14.89    | 0.87    |
| D17S1299   | 8                         | 16.52    | 0.04    | 20                           | 28.46    | 0.10    |
| SNP427776  | 10                        | 13.04    | 0.22    | 35                           | 31.02    | 0.66    |
| AAT245     | 11                        | 12.59    | 0.32    | 30                           | 33.59    | 0.30    |
| D17S1290   | 12                        | 15.45    | 0.22    | 51                           | 57.97    | 0.23    |
| D17S2193   | 17                        | 22.51    | 0.17    | 36                           | 33.93    | 0.57    |
| D17S1301   | 6                         | 2.72     | 0.84    | 15                           | 19.02    | 0.21    |
| TTCA006    | 6                         | 5.80     | 0.45    | 14                           | 12.10    | 0.60    |
| AAT095     | 10                        | 11.26    | 0.34    | 30                           | 34.30    | 0.27    |
